# Supplementary material
Source: Royal Society of Chemistry journal article supplement (doi:10.1039/d6cp01036a)
Supplement: d6cp01036a1.pdf [file d6cp01036a1.pdf]

**Supporting Information For**  
**Theoretical Study of Electronic Structure and Chemical Bonding in MOB<sup>-</sup> and MBO<sup>-</sup> (M = Sc – Zn) Molecules**

Ze-Hui Wang<sup>a,b</sup>, Xue-Lian Jiang<sup>b</sup>, Xiaohu Yu<sup>a</sup>, Tianlei Zhang<sup>a\*</sup>, Jun Li<sup>c,d</sup>, Cong-Qiao Xu<sup>b\*</sup>

<sup>a</sup> Shaanxi Key Laboratory of Catalysis, Institute of Theoretical and Computational Chemistry, Shaanxi University of Technology, Hanzhong 723000, China

<sup>b</sup> Department of Chemistry, Southern University of Science and Technology, Shenzhen 518055, China

<sup>c</sup> Department of Chemistry and Engineering Research Center of Advanced Rare-Earth Materials of Ministry of Education, Tsinghua University, Beijing 100084, China

<sup>d</sup> Fundamental Science Center of Rare Earths, Ganjiang Innovation Academy, Chinese Academy of Sciences, Ganzhou 341000, China

\* Corresponding authors: ztianlei88@163.com, xucq@sustech.edu.cn

**KEYWORDS** boronyl ligand • transition metal complex • electronic structure • chemical bonding  
• periodic trend

**Table S1.** Valence electronic configurations and orbital compositions of CO and BO molecules, based on the energy level and irreducible representation shown in Figure 1.

|    | Valence configuration            |    | Valence configuration            |
|----|----------------------------------|----|----------------------------------|
|    | $2\pi^0(83.12\%B + 16.88\%O)$    |    | $2\pi^0(77.97\%C + 22.03\%O)$    |
|    | $5\sigma^1(86.74\%B + 13.26\%O)$ |    | $5\sigma^2(90.98\%C + 9.02\%O)$  |
| BO | $1\pi^4(80.43\%O + 19.57\%B)$    | CO | $1\pi^4(73.89\%O + 26.11\%C)$    |
|    | $4\sigma^2(81.46\%O + 18.55\%B)$ |    | $4\sigma^2(80.60\%O + 19.40\%C)$ |
|    | $3\sigma^2(84.66\%O + 15.34\%B)$ |    | $3\sigma^2(76.09\%O + 23.91\%C)$ |

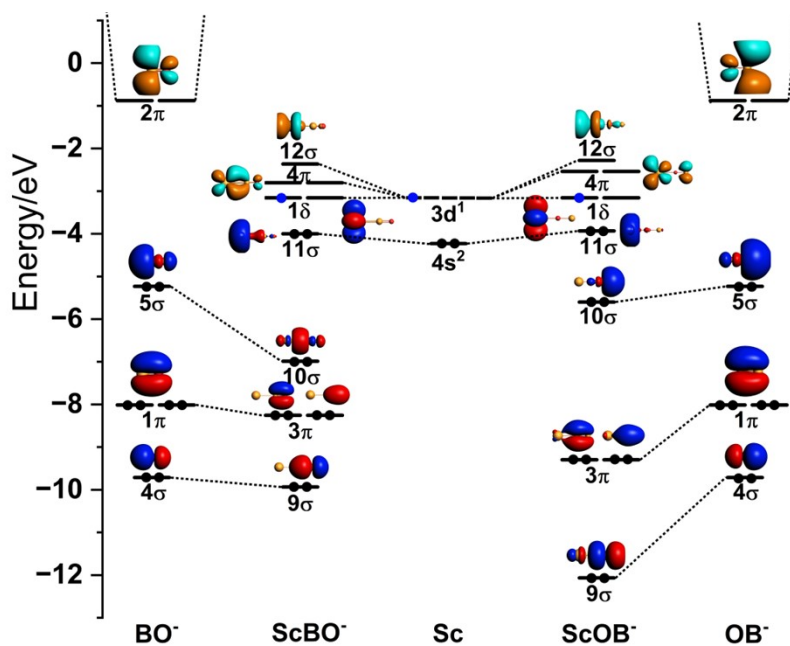

**Figure S1.** Molecular orbital (MO) energy levels of  $\text{Sc}(\text{OB})^-$  and  $\text{Sc}(\text{BO})^-$  calculated at the PBE/TZ2P level, based on geometries optimized at the CCSD(T)/def2-TZVP level.

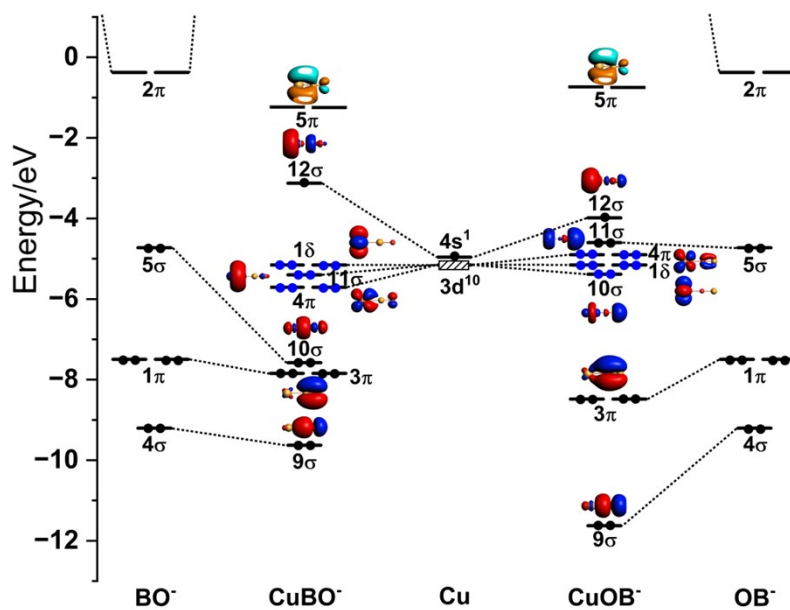

**Figure S2.** Molecular orbital (MO) energy levels of  $\text{Cu}(\text{OB})^-$  and  $\text{Cu}(\text{BO})^-$  calculated at the PBE/TZ2P level, based on geometries optimized at the CCSD(T)/def2-TZVP level.

**Table S2.** The electron configurations of  $M(\text{OB})^-$  and  $M(\text{BO})^-$  ( $M = \text{Sc} - \text{Zn}$ ) at the PBE/TZ2P level

(All energies in kcal/mol). The ground states are highlighted in bold.

| $M(\text{BO})^-$    | $2s + 1$ | Configuration                                | Energy         | $M(\text{OB})^-$    | $2s + 1$ | Configuration                                | Energy         |
|---------------------|----------|----------------------------------------------|----------------|---------------------|----------|----------------------------------------------|----------------|
|                     | <b>2</b> | <b>a. <math>\pi^1</math></b>                 | <b>-360.81</b> |                     | 2        | a. $\pi^1$                                   | -360.92        |
| Sc(BO) <sup>-</sup> | 2        | b. $\delta^1$                                | -358.24        | Sc(OB) <sup>-</sup> | <b>2</b> | <b>b. <math>\delta^1</math></b>              | <b>-364.55</b> |
|                     | 2        | c. $\sigma^1$                                | -350.13        |                     | 2        | c. $\sigma^1$                                | -354.2         |
|                     | <b>3</b> | <b>a. <math>\pi^2</math></b>                 | <b>-385.78</b> |                     | 3        | a. $\pi^2$                                   | -378.91        |
| Ti(BO) <sup>-</sup> | 3        | b. $\delta^2$                                | -378.95        | Ti(OB) <sup>-</sup> | 3        | b. $\delta^2$                                | -383.52        |
|                     | 3        | c. $\sigma^2$                                | -315.94        |                     | 3        | c. $\sigma^2$                                | -317.2         |
|                     | 3        | d. $\pi^1\sigma^1$                           | -385.48        |                     | <b>3</b> | <b>d. <math>\pi^1\sigma^1</math></b>         | <b>-383.76</b> |
|                     | 2        | a. $\sigma^2\delta^1$                        | -406.27        |                     | 2        | a. $\sigma^2\delta^1$                        | -390.94        |
| V(BO) <sup>-</sup>  | 2        | b. $\sigma^2\pi^1$                           | -307.27        | V(OB) <sup>-</sup>  | 2        | b. $\sigma^2\pi^1$                           | -306.39        |
|                     | 4        | c. $\pi^2\delta^1$                           | -423.55        |                     | 4        | c. $\pi^2\delta^1$                           | -409.75        |
|                     | 4        | d. $\delta^2\pi^1$                           | -414.54        |                     | 4        | d. $\delta^2\pi^1$                           | -410.76        |
|                     | 4        | e. $\pi^2\sigma^1$                           | -375.79        |                     | 4        | e. $\pi^2\sigma^1$                           | -369.98        |
|                     | 4        | f. $\delta^2\sigma^1$                        | -393.77        |                     | 4        | f. $\delta^2\sigma^1$                        | -397.53        |
|                     | <b>6</b> | <b>g. <math>\pi^2\delta^2</math></b>         | <b>-425.66</b> |                     | <b>6</b> | <b>g. <math>\pi^2\delta^2</math></b>         | <b>-415.59</b> |
|                     | 1        | a. $\pi^4$                                   | -375.69        |                     | 1        | a. $\pi^4$                                   | -345.22        |
| Cr(BO) <sup>-</sup> | 1        | b. $\delta^4$                                | -334.85        | Cr(OB) <sup>-</sup> | 1        | b. $\delta^4$                                | -334.73        |
|                     | 3        | c. $\pi^2\sigma^2$                           | -316.07        |                     | 3        | c. $\pi^2\sigma^2$                           | -313.53        |
|                     | 3        | d. $\delta^2\sigma^2$                        | -365.98        |                     | 3        | d. $\delta^2\sigma^2$                        | -368.43        |
|                     | 5        | e. $\pi^2\delta^2$                           | -470.25        |                     | 5        | e. $\pi^2\delta^2$                           | -458.70        |
|                     | <b>7</b> | <b>f. <math>\pi^2\delta^2\sigma^1</math></b> | <b>-472.27</b> |                     | <b>7</b> | <b>f. <math>\pi^2\delta^2\sigma^1</math></b> | <b>-461.11</b> |
|                     | 2        | a. $\pi^4\sigma^1$                           | -320.55        |                     | 2        | a. $\pi^4\sigma^1$                           | -299.65        |
| Mn(BO) <sup>-</sup> | 2        | b. $\delta^4\sigma^1$                        | -347.50        | Mn(OB) <sup>-</sup> | 2        | b. $\delta^4\sigma^1$                        | -345.46        |
|                     | 2        | c. $\pi^4\sigma^2$                           | -274.76        |                     | 2        | c. $\pi^4\sigma^2$                           | -253.07        |
|                     | 2        | d. $\delta^4\sigma^2$                        | -308.79        |                     | 2        | d. $\delta^4\sigma^2$                        | -314.05        |
|                     | <b>6</b> | <b>e. <math>\pi^2\delta^2\sigma^1</math></b> | <b>-472.77</b> |                     | <b>6</b> | <b>e. <math>\pi^2\delta^2\sigma^1</math></b> | <b>-468.32</b> |
|                     | 6        | f. $\pi^2\delta^2\sigma^2$                   | -437.80        |                     | 6        | f. $\pi^2\delta^2\sigma^2$                   | -426.40        |
|                     | 1        | a. $\pi^4\sigma^2$                           | -308.3         |                     | 1        | a. $\pi^4\sigma^2$                           | -216.96        |
| Fe(BO) <sup>-</sup> | 1        | b. $\delta^4\sigma^2$                        | -220.61        | Fe(OB) <sup>-</sup> | 1        | b. $\delta^4\sigma^2$                        | -314.21        |
|                     | <b>3</b> | <b>c. <math>\pi^2\delta^4</math></b>         | <b>-452.55</b> |                     | 3        | c. $\pi^2\delta^4$                           | -398.57        |
|                     | 3        | d. $\pi^4\delta^2$                           | -412.58        |                     | <b>3</b> | <b>d. <math>\pi^4\delta^2</math></b>         | <b>-419.11</b> |
|                     | 5        | e. $\pi^2\delta^2\sigma^2$                   | -417.21        |                     | 5        | e. $\pi^2\delta^2\sigma^2$                   | -415.44        |
|                     | 5        | f. $\delta^4\pi^2\sigma^1$                   | -413.02        |                     | 5        | f. $\delta^4\pi^2\sigma^1$                   | -403.25        |
|                     | 5        | g. $\delta^2\pi^4\sigma^1$                   | -444.64        |                     | 5        | g. $\delta^2\pi^4\sigma^1$                   | -415.73        |
|                     | 2        | <b>a. <math>\pi^4\delta^3</math></b>         | <b>-437.60</b> |                     | 2        | a. $\pi^4\delta^3$                           | -402.81        |
| Co(BO) <sup>-</sup> | 2        | b. $\delta^4\pi^3$                           | -415.58        | Co(OB) <sup>-</sup> | 2        | b. $\delta^4\pi^3$                           | -389.52        |
|                     | 2        | c. $\pi^4\delta^4$                           | -405.62        |                     | 2        | e. $\pi^4\delta^4$                           | -367.59        |
|                     | 4        | d. $\delta^4\pi^2\sigma^1$                   | -419.5         |                     | <b>4</b> | <b>d. <math>\delta^4\pi^2\sigma^1</math></b> | <b>-408.98</b> |
|                     | 4        | e. $\pi^4\delta^2\sigma^1$                   | -424.95        |                     | 4        | c. $\pi^4\delta^2\sigma^1$                   | -399.96        |
|                     | 4        | f. $\delta^4\pi^2\sigma^2$                   | -375.42        |                     | 4        | f. $\delta^4\pi^2\sigma^2$                   | -375.9         |
|                     | 4        | g. $\delta^2\pi^4\sigma^2$                   | -382.46        |                     | 4        | g. $\delta^2\pi^4\sigma^2$                   | -366.99        |
|                     | <b>1</b> | <b>a. <math>\pi^4\delta^4</math></b>         | <b>-398.26</b> |                     | <b>1</b> | <b>a. <math>\pi^4\delta^4</math></b>         | <b>-358.65</b> |
| Ni(BO) <sup>-</sup> | 3        | b. $\pi^4\delta^2\sigma^2$                   | -295.69        | Ni(OB) <sup>-</sup> | 3        | b. $\pi^4\delta^2\sigma^2$                   | -292.52        |
|                     | 3        | c. $\delta^4\pi^2\sigma^2$                   | -325.27        |                     | 3        | c. $\delta^4\pi^2\sigma^2$                   | -325.51        |
|                     | 3        | d. $\pi^4\delta^3\sigma^1$                   | -374.21        |                     | 3        | d. $\pi^4\delta^3\sigma^1$                   | -356.54        |
|                     | 3        | e. $\pi^4\delta^4\sigma^1$                   | -376.52        |                     | 3        | e. $\pi^4\delta^4\sigma^1$                   | -353.98        |
|                     | 3        | f. $\pi^4\delta^3\sigma^2$                   | -376.46        |                     | 3        | f. $\pi^4\delta^3\sigma^2$                   | -357.04        |

|                     |          |                                              |                |                     |          |                                              |                |
|---------------------|----------|----------------------------------------------|----------------|---------------------|----------|----------------------------------------------|----------------|
| Cu(BO) <sup>-</sup> | 2        | a. $\pi^4\delta^4\sigma^1$                   | -318.25        | Cu(OB) <sup>-</sup> | 2        | a. $\pi^4\delta^4\sigma^1$                   | /              |
|                     | <b>2</b> | <b>b. <math>\pi^4\delta^4\sigma^2</math></b> | <b>-369.98</b> |                     | <b>2</b> | <b>b. <math>\pi^4\delta^4\sigma^2</math></b> | <b>-345.18</b> |
| Zn(BO) <sup>-</sup> | <b>1</b> | <b>a. <math>\pi^4\delta^4\sigma^2</math></b> | <b>-323.69</b> | Zn(OB) <sup>-</sup> | <b>1</b> | <b>a. <math>\pi^4\delta^4\sigma^2</math></b> | <b>-320.95</b> |



**Table S4.** Relative energies (in kcal/mol) of the lowest lying state for MOB<sup>-</sup> and MBO<sup>-</sup> (M = Sc - Zn) complexes at the PBE, PBE0 and CCSD(T) levels of theory, respectively.

| M  | PBE              |                  | PBE0             |                  | CCSD(T)          |                  |
|----|------------------|------------------|------------------|------------------|------------------|------------------|
|    | MBO <sup>-</sup> | MOB <sup>-</sup> | MBO <sup>-</sup> | MOB <sup>-</sup> | MBO <sup>-</sup> | MOB <sup>-</sup> |
| Sc | 0.00             | -6.31            | 0.00             | -7.6             | 0.00             | -8.79            |
| Ti | 0.00             | 2.02             | 0.00             | -0.03            | 0.00             | -3.19            |
| V  | 0.00             | 13.80            | 0.00             | 4.89             | 0.00             | 1.26             |
| Cr | 0.00             | 11.16            | 0.00             | 9.13             | 0.00             | 9.41             |
| Mn | 0.00             | 4.45             | 0.00             | 1.04             | 0.00             | -0.18            |
| Fe | 0.00             | 7.97             | 0.00             | 3.84             | 0.00             | 1.26             |
| Co | 0.00             | 25.92            | 0.00             | 30.24            | 0.00             | 20.71            |
| Ni | 0.00             | 19.42            | 0.00             | -15.89           | 0.00             | 23.22            |
| Cu | 0.00             | 24.80            | 0.00             | 21.88            | 0.00             | 21.34            |
| Zn | 0.00             | 2.74             | 0.00             | 2.02             | 0.00             | 0.63             |

**Table S5.** The electron configurations of M(BO)<sup>-</sup> and M(OB)<sup>-</sup> molecules at the PBE/TZ2P level, with geometric structures from CCSD(T)/def2-TZVP. The ground state species are highlighted in bold. Note: The italic electron configuration corresponds specifically to the occupancy of the metal's 3d orbitals.

| M(BO) <sup>-</sup>        | 2S+1     | Valence Configuration                                                                                        | M(OB) <sup>-</sup>        | 2S+1     | Valence Configuration                                                                                                                                                        |
|---------------------------|----------|--------------------------------------------------------------------------------------------------------------|---------------------------|----------|------------------------------------------------------------------------------------------------------------------------------------------------------------------------------|
| Sc(BO) <sup>-</sup>       | 2        | <i>9σ<sup>2</sup>3π<sup>4</sup>10σ<sup>2</sup>11σ<sup>2</sup>1δ<sup>1</sup></i>                              | <b>Sc(OB)<sup>-</sup></b> | <b>2</b> | <b>9σ<sup>2</sup>3π<sup>4</sup>10σ<sup>2</sup>11σ<sup>2</sup>1δ<sup>1</sup></b>                                                                                              |
| <b>Ti(BO)<sup>-</sup></b> | <b>3</b> | <b>9σ<sup>2</sup>3π<sup>4</sup>10σ<sup>2</sup>11σ<sup>2</sup>1δ<sup>1</sup>4π<sup>1</sup></b>                | Ti(OB) <sup>-</sup>       | 3        | <i>9σ<sup>2</sup>3π<sup>4</sup>10σ<sup>2</sup>11σ<sup>2</sup>1δ<sup>1</sup>4π<sup>1</sup></i>                                                                                |
| <b>V(BO)<sup>-</sup></b>  | <b>4</b> | <b>9σ<sup>2</sup>3π<sup>4</sup>10σ<sup>2</sup>4π<sup>2</sup>1δ<sup>1</sup>11σ<sup>2</sup></b>                | V(OB) <sup>-</sup>        | 4        | <i>9σ<sup>2</sup>3π<sup>4</sup>10σ<sup>2</sup>1δ<sup>1</sup>4π<sup>2</sup>11σ<sup>2</sup></i>                                                                                |
| <b>Cr(BO)<sup>-</sup></b> | <b>7</b> | <b>9σ<sup>2</sup>3π<sup>4</sup>10σ<sup>2</sup>11σ<sup>1</sup>4π<sup>2</sup>1δ<sup>1</sup>12σ<sup>1</sup></b> | Cr(OB) <sup>-</sup>       | 7        | <i>9σ<sup>2</sup>3π<sup>4</sup>10σ<sup>2</sup>11σ<sup>1</sup>1δ<sup>1</sup>4π<sup>2</sup>12σ<sup>1</sup></i>                                                                 |
| Mn(BO) <sup>-</sup>       | 6        | <i>9σ<sup>2</sup>3π<sup>4</sup>10σ<sup>2</sup>1δ<sup>1</sup>11σ<sup>1</sup>4π<sup>2</sup>12σ<sup>2</sup></i> | <b>Mn(OB)<sup>-</sup></b> | <b>6</b> | <b>9σ<sup>2</sup>3π<sup>4</sup>1δ<sup>1</sup>4π<sup>2</sup>10σ<sup>1</sup>11σ<sup>2</sup>12σ<sup>2</sup></b>                                                                 |
| <b>Fe(BO)<sup>-</sup></b> | <b>5</b> | <b>9σ<sup>2</sup>3π<sup>4</sup>10σ<sup>2</sup>4π<sup>2</sup>1δ<sup>1</sup>11σ<sup>1</sup>12σ<sup>2</sup></b> | Fe(OB) <sup>-</sup>       | 5        | <i>9σ<sup>2</sup>3π<sup>4</sup>4π<sup>2</sup>10σ<sup>1</sup>1δ<sup>1</sup>11σ<sup>2</sup>12σ<sup>2</sup></i>                                                                 |
| <b>Co(BO)<sup>-</sup></b> | <b>4</b> | <b>9σ<sup>2</sup>3π<sup>4</sup>10σ<sup>2</sup>11σ<sup>1</sup>4π<sup>1</sup>1δ<sup>1</sup>12σ<sup>1</sup></b> | Co(OB) <sup>-</sup>       | 4        | <i>9σ<sup>2</sup>3π<sup>4</sup>10σ<sup>2</sup>11σ<sup>1</sup>1δ<sup>1</sup>4π<sup>1</sup>12σ<sup>1</sup></i>                                                                 |
| <b>Ni(BO)<sup>-</sup></b> | <b>3</b> | <b>9σ<sup>2</sup>3π<sup>4</sup>10σ<sup>2</sup>11σ<sup>2</sup>4π<sup>1</sup>1δ<sup>1</sup>12σ<sup>1</sup></b> | Ni(OB) <sup>-</sup>       | 3        | <i>9σ<sup>2</sup>3π<sup>4</sup>1δ<sup>1</sup>10σ<sup>2</sup>4π<sup>1</sup>11σ<sup>2</sup>12σ<sup>1</sup></i>                                                                 |
| <b>Cu(BO)<sup>-</sup></b> | <b>2</b> | <b>9σ<sup>2</sup>3π<sup>4</sup>10σ<sup>2</sup>4π<sup>1</sup>11σ<sup>2</sup>1δ<sup>1</sup>12σ<sup>1</sup></b> | Cu(OB) <sup>-</sup>       | 2        | <i>9σ<sup>2</sup>3π<sup>4</sup>10σ<sup>2</sup>1δ<sup>1</sup>4π<sup>1</sup>11σ<sup>2</sup>12σ<sup>1</sup></i>                                                                 |
| <b>Zn(BO)<sup>-</sup></b> | <b>1</b> | <b>1δ<sup>1</sup>9σ<sup>2</sup>3π<sup>4</sup>10σ<sup>2</sup>4π<sup>1</sup>11σ<sup>2</sup>12σ<sup>2</sup></b> | Zn(OB) <sup>-</sup>       | 1        | <i>11a<sup>2</sup>3a<sup>''2</sup>12a<sup>''2</sup>4a<sup>''2</sup>13a<sup>''2</sup>14a<sup>''2</sup>15a<sup>''2</sup>5a<sup>''2</sup>16a<sup>''2</sup>17a<sup>''2</sup></i> |

**Table S6.** T1 diagnostic values computed at the CCSD(T)/def2-TZVP level for the most stable monoboronyl complexes  $M(\text{BO})^-/M(\text{OB})^-$  across the 3d series.

| M                   | $2s + 1$ | T1    |
|---------------------|----------|-------|
| Sc(OB) <sup>-</sup> | 2        | 0.035 |
| Ti(OB) <sup>-</sup> | 3        | 0.030 |
| V(BO) <sup>-</sup>  | 4        | 0.045 |
| Cr(BO) <sup>-</sup> | 7        | 0.025 |
| Mn(OB) <sup>-</sup> | 6        | 0.024 |
| Fe(BO) <sup>-</sup> | 5        | 0.030 |
| Co(BO) <sup>-</sup> | 4        | 0.030 |
| Ni(BO) <sup>-</sup> | 3        | 0.033 |
| Cu(BO) <sup>-</sup> | 2        | 0.030 |
| Zn(BO) <sup>-</sup> | 1        | 0.018 |

**Table S7.** The bond length (in Å) and bond angle (in °) and frequency (in cm<sup>-1</sup>) of in M(BO)<sup>-</sup> and M(OB)<sup>-</sup> (M=Sc-Zn). Note that the slight nonlinearity reported for Sc(OB)<sup>-</sup> (179.8°) and Mn(OB)<sup>-</sup> (178.6°) are attributed to Jahn-Teller distortion with electrons occupying on the non-degenerated MOs.

| Species                          | ∠M-B-O | Length |      | Frequency |     | Species                          | ∠M-O-B | Length |      | Frequency |     |
|----------------------------------|--------|--------|------|-----------|-----|----------------------------------|--------|--------|------|-----------|-----|
|                                  |        | M-B    | B-O  | O-B       | B-M |                                  |        | M-O    | O-B  | O-B       | O-M |
| <sup>2</sup> Sc(BO) <sup>-</sup> | 180.0  | 2.58   | 1.23 | 1815      | 256 | <sup>2</sup> Sc(OB) <sup>-</sup> | 179.8  | 2.08   | 1.26 | 1615      | 413 |
| <sup>3</sup> Ti(BO) <sup>-</sup> | 180.0  | 2.41   | 1.23 | 1806      | 273 | <sup>3</sup> Ti(OB) <sup>-</sup> | 180.0  | 1.96   | 1.27 | 1586      | 473 |
| <sup>6</sup> V(BO) <sup>-</sup>  | 180.0  | 2.27   | 1.23 | 1800      | 288 | <sup>6</sup> V(OB) <sup>-</sup>  | 180.0  | 2.00   | 1.26 | 1657      | 397 |
| <sup>7</sup> Cr(BO) <sup>-</sup> | 180.0  | 2.29   | 1.23 | 1795      | 288 | <sup>7</sup> Cr(OB) <sup>-</sup> | 180.0  | 2.08   | 1.26 | 1677      | 313 |
| <sup>6</sup> Mn(BO) <sup>-</sup> | 180.0  | 2.42   | 1.23 | 1805      | 213 | <sup>6</sup> Mn(OB) <sup>-</sup> | 178.6  | 2.07   | 1.26 | 1653      | 301 |
| <sup>3</sup> Fe(BO) <sup>-</sup> | 180.0  | 2.26   | 1.23 | 1822      | 249 | <sup>5</sup> Fe(OB) <sup>-</sup> | 180.0  | 1.97   | 1.26 | 1652      | 350 |
| <sup>2</sup> Co(BO) <sup>-</sup> | 180.0  | 2.02   | 1.24 | 1767      | 339 | <sup>4</sup> Co(OB) <sup>-</sup> | 180.0  | 2.00   | 1.25 | 1691      | 305 |
| <sup>1</sup> Ni(BO) <sup>-</sup> | 180.0  | 1.96   | 1.24 | 1833      | 399 | <sup>1</sup> Ni(OB) <sup>-</sup> | 180.0  | 1.96   | 1.25 | 1694      | 327 |
| <sup>2</sup> Cu(BO) <sup>-</sup> | 180.0  | 1.98   | 1.23 | 1814      | 333 | <sup>2</sup> Cu(OB) <sup>-</sup> | 180.0  | 1.93   | 1.25 | 1693      | 318 |
| <sup>1</sup> Zn(BO) <sup>-</sup> | 179.9  | 2.51   | 1.24 | 1781      | 150 | <sup>1</sup> Zn(OB) <sup>-</sup> | 167.9  | 2.17   | 1.25 | 1657      | 196 |

**Table S8.** Atomic charges of M, BO<sup>-</sup> ligands and bond orders of M-B and B-O bonds in M(BO)<sup>-</sup>

(M = Sc - Zn)

| Species                          | Mulliken Charge |                     | Hirshfeld Charge |                     | Mayer bond order |      |
|----------------------------------|-----------------|---------------------|------------------|---------------------|------------------|------|
|                                  | q(M)            | q(BO <sup>-</sup> ) | q(M)             | q(BO <sup>-</sup> ) | M-B              | B-O  |
| <sup>2</sup> Sc(BO) <sup>-</sup> | -0.52           | -0.48               | -0.49            | -0.51               | 0.80             | 2.10 |
| <sup>3</sup> Ti(BO) <sup>-</sup> | -0.55           | -0.44               | -0.45            | -0.56               | 0.97             | 2.05 |
| <sup>4</sup> V(BO) <sup>-</sup>  | -0.59           | -0.41               | -0.48            | -0.52               | 1.01             | 2.06 |
| <sup>7</sup> Cr(BO) <sup>-</sup> | -0.46           | -0.55               | -0.37            | -0.63               | 0.97             | 2.04 |
| <sup>6</sup> Mn(BO) <sup>-</sup> | -0.54           | -0.46               | -0.48            | -0.52               | 0.67             | 2.08 |
| <sup>5</sup> Fe(BO) <sup>-</sup> | -0.41           | -0.59               | -0.39            | -0.61               | 0.76             | 2.08 |
| <sup>4</sup> Co(BO) <sup>-</sup> | -0.49           | -0.51               | -0.42            | -0.58               | 1.19             | 1.98 |
| <sup>3</sup> Ni(BO) <sup>-</sup> | -0.53           | -0.47               | -0.38            | -0.62               | 1.05             | 2.01 |
| <sup>2</sup> Cu(BO) <sup>-</sup> | -0.67           | -0.33               | -0.45            | -0.55               | 1.11             | 2.05 |
| <sup>1</sup> Zn(BO) <sup>-</sup> | -0.37           | -0.63               | -0.37            | -0.63               | 0.39             | 2.03 |

**Table S9.** Theoretical charges of M, OB<sup>-</sup> ligands and bond orders of M-B and B-O bonds in M(OB)<sup>-</sup>

(M=Sc-Zn)

| Species                          | Mulliken Charge |                     | Hirshfeld Charge |                     | Mayer bond order |      |
|----------------------------------|-----------------|---------------------|------------------|---------------------|------------------|------|
|                                  | q(M)            | q(OB <sup>-</sup> ) | q(M)             | q(OB <sup>-</sup> ) | M-O              | O-B  |
| <sup>2</sup> Sc(OB) <sup>-</sup> | -0.27           | -0.73               | -0.43            | -0.57               | 0.43             | 1.61 |
| <sup>3</sup> Ti(OB) <sup>-</sup> | -0.27           | -0.73               | -0.44            | -0.56               | 0.53             | 1.57 |
| <sup>4</sup> V(OB) <sup>-</sup>  | -0.29           | -0.71               | -0.44            | -0.56               | 0.49             | 1.60 |
| <sup>7</sup> Cr(OB) <sup>-</sup> | -0.21           | -0.79               | -0.29            | -0.71               | 0.35             | 1.67 |
| <sup>6</sup> Mn(OB) <sup>-</sup> | -0.28           | -0.72               | -0.36            | -0.64               | 0.37             | 1.60 |
| <sup>5</sup> Fe(OB) <sup>-</sup> | -0.32           | -0.68               | -0.40            | -0.60               | 0.44             | 1.58 |
| <sup>4</sup> Co(OB) <sup>-</sup> | -0.24           | -0.76               | -0.31            | -0.69               | 0.42             | 1.62 |
| <sup>3</sup> Ni(OB) <sup>-</sup> | -0.33           | -0.67               | -0.31            | -0.70               | 0.43             | 1.63 |
| <sup>2</sup> Cu(OB) <sup>-</sup> | -0.30           | -0.70               | -0.33            | -0.67               | 0.46             | 1.66 |
| <sup>1</sup> Zn(OB) <sup>-</sup> | -0.26           | -0.75               | -0.25            | -0.75               | 0.21             | 1.67 |

**Table S10.** The EDA-NOCV results for the  $M(\text{BO})^-$  ( $M = \text{Sc-Zn}$ ) complexes at the PBE/TZ2P level. All the energies are given in kcal/mol. The table lists the total interaction energy ( $\Delta E_{\text{int}}$ ), Pauli repulsion ( $\Delta E_{\text{Pauli}}$ ), electrostatic interaction ( $\Delta E_{\text{elstat}}$ ), and orbital interaction ( $\Delta E_{\text{orb}}$ ), together with the  $\sigma$ - and  $\pi$ -components of  $\Delta E_{\text{orb}}$  ( $\Delta E_{\text{orb } \sigma}$  and  $\Delta E_{\text{orb } \pi}$ ). Percentages in parentheses indicate the relative contributions of  $\Delta E_{\text{elstat}}$  and  $\Delta E_{\text{orb}}$  to the total attractive interactions ( $\Delta E_{\text{elstat}} + \Delta E_{\text{orb}}$ ), and of

| $\Delta E(\text{kcal/mol})$     | Sc + (BO) <sup>-</sup>                                                 | Ti + (BO) <sup>-</sup>                                                    | V + (BO) <sup>-</sup>                                                     | Cr + (BO) <sup>-</sup>                                                    | Mn + (BO) <sup>-</sup>                                                    |
|---------------------------------|------------------------------------------------------------------------|---------------------------------------------------------------------------|---------------------------------------------------------------------------|---------------------------------------------------------------------------|---------------------------------------------------------------------------|
| fragments                       | Sc( $\delta^1$ )<br>BO <sup>-</sup> ( $1\pi^45\sigma^2$ )              | Ti( $\delta^1\pi^1$ )<br>BO <sup>-</sup><br>( $1\pi^45\sigma^2$ )         | V( $\pi^2\delta^1$ )<br>BO <sup>-</sup><br>( $1\pi^45\sigma^2$ )          | Cr( $\pi^2\delta^2\sigma^1$ )<br>BO <sup>-</sup><br>( $1\pi^45\sigma^2$ ) | Mn( $\pi^2\delta^2\sigma^1$ )<br>BO <sup>-</sup><br>( $1\pi^45\sigma^2$ ) |
| $\Delta E_{\text{int}}$         | -49.69                                                                 | -49.67                                                                    | -63.21                                                                    | -36.88                                                                    | -36.09                                                                    |
| $\Delta E_{\text{Pauli}}$       | 92.82                                                                  | 115.47                                                                    | 139.50                                                                    | 111.97                                                                    | 110.95                                                                    |
| $\Delta E_{\text{elstat}}$      | -85.69<br>(60.12%)                                                     | -102.71<br>(62.20%)                                                       | -127.86<br>(63.08%)                                                       | -105.58<br>(70.93%)                                                       | -91.87<br>(62.47%)                                                        |
| $\Delta E_{\text{orb}}$         | -56.83<br>(39.88%)                                                     | -62.43<br>(37.80%)                                                        | -74.85<br>(36.92%)                                                        | -43.27<br>(29.07%)                                                        | -55.17<br>(37.53%)                                                        |
| $\Delta E_{\text{orb } \sigma}$ | -50.32<br>(88.54%)                                                     | -56.73<br>(90.87%)                                                        | -61.89<br>(82.69%)                                                        | -36.22<br>(83.71%)                                                        | -52.29<br>(94.78%)                                                        |
| $\Delta E_{\text{orb } \pi}$    | -0.84<br>(1.48%)                                                       | -5.34<br>(8.56%)                                                          | -7.25<br>(9.69%)                                                          | -6.07<br>(14.03%)                                                         | -1.66<br>(3.01%)                                                          |
| $\Delta E(\text{kcal/mol})$     | Fe + (BO) <sup>-</sup>                                                 | Co + (BO) <sup>-</sup>                                                    | Ni + (BO) <sup>-</sup>                                                    | Cu + (BO) <sup>-</sup>                                                    | Zn + (BO) <sup>-</sup>                                                    |
| fragments                       | Fe( $\pi^2\delta^3\sigma^1$ ) BO <sup>-</sup><br>( $1\pi^45\sigma^2$ ) | Co( $\pi^4\delta^3\sigma^1$ )<br>BO <sup>-</sup><br>( $1\pi^45\sigma^2$ ) | Ni( $\pi^4\delta^3\sigma^2$ )<br>BO <sup>-</sup><br>( $1\pi^45\sigma^2$ ) | Cu( $\pi^4\delta^4\sigma^2$ )<br>BO <sup>-</sup><br>( $1\pi^45\sigma^2$ ) | Zn( $\pi^4\delta^4\sigma^2$ )<br>BO <sup>-</sup><br>( $1\pi^45\sigma^2$ ) |
| $\Delta E_{\text{int}}$         | -52.79                                                                 | -59.90                                                                    | -63.00                                                                    | -56.62                                                                    | -14.65                                                                    |
| $\Delta E_{\text{Pauli}}$       | 112.76                                                                 | 171.51                                                                    | 190.83                                                                    | 184.08                                                                    | 76.68                                                                     |
| $\Delta E_{\text{elstat}}$      | -110.18<br>(66.55%)                                                    | -160.71<br>(69.21%)                                                       | -180.04<br>(70.65%)                                                       | -173.70<br>(72.16%)                                                       | -58.26<br>(63.79%)                                                        |
| $\Delta E_{\text{orb}}$         | -55.38<br>(33.45%)                                                     | -76.07<br>(30.79%)                                                        | -74.79<br>(29.35%)                                                        | -67.00<br>(27.84%)                                                        | -33.07<br>(36.21%)                                                        |
| $\Delta E_{\text{orb } \sigma}$ | -43.20<br>(78.00%)                                                     | -46.53<br>(61.17%)                                                        | -51.95<br>(69.46%)                                                        | -57.30<br>(85.52%)                                                        | -29.48<br>(89.14%)                                                        |
| $\Delta E_{\text{orb } \pi}$    | -2.64<br>(4.76%)                                                       | -17.02<br>(22.37%)                                                        | -13.62<br>(18.21%)                                                        | -9.49<br>(14.16%)                                                         | /                                                                         |

$\Delta E_{\text{orb } \sigma}$  and  $\Delta E_{\text{orb } \pi}$  to  $\Delta E_{\text{orb}}$ , respectively.

**Table S11.** The EDA-NOCV results for the  $M(\text{OB})^-$  ( $M = \text{Sc-Zn}$ ) complexes at the PBE/TZ2P level. All energies are given in  $\text{kcal}\cdot\text{mol}^{-1}$ . The table lists the total interaction energy ( $\Delta E_{\text{int}}$ ), Pauli repulsion ( $\Delta E_{\text{Pauli}}$ ), electrostatic interaction ( $\Delta E_{\text{elstat}}$ ), and orbital interaction ( $\Delta E_{\text{orb}}$ ), together with the  $\sigma$ - and  $\pi$ -components of  $\Delta E_{\text{orb}}$  ( $\Delta E_{\text{orb } \sigma}$  and  $\Delta E_{\text{orb } \pi}$ ). Percentages in parentheses indicate the relative contributions of  $\Delta E_{\text{elstat}}$  and  $\Delta E_{\text{orb}}$  to the total attractive interactions ( $\Delta E_{\text{elstat}} + \Delta E_{\text{orb}}$ ), and of  $\Delta E_{\text{orb } \sigma}$  and  $\Delta E_{\text{orb } \pi}$  to  $\Delta E_{\text{orb}}$ , respectively.

| $\Delta E(\text{kcal/mol})$     | Sc + (OB) <sup>-</sup>                                                 | Ti + (OB) <sup>-</sup>                                                 | V + (OB) <sup>-</sup>                                                  | Cr + (OB) <sup>-</sup>                                                 | Mn + (OB) <sup>-</sup>                                                 |
|---------------------------------|------------------------------------------------------------------------|------------------------------------------------------------------------|------------------------------------------------------------------------|------------------------------------------------------------------------|------------------------------------------------------------------------|
| Interaction fragments           | Sc( $\delta^1$ )<br>OB <sup>-</sup> ( $1\pi^45\sigma^2$ )              | Ti( $\delta^1\pi^1$ )<br>OB <sup>-</sup> ( $1\pi^45\sigma^2$ )         | V( $\pi^2\delta^1$ )<br>OB <sup>-</sup> ( $1\pi^45\sigma^2$ )          | Cr( $\pi^2\delta^2\sigma^1$ )<br>OB <sup>-</sup> ( $1\pi^45\sigma^2$ ) | Mn( $\pi^2\delta^2\sigma^1$ )<br>OB <sup>-</sup> ( $1\pi^45\sigma^2$ ) |
| $\Delta E_{\text{int}}$         | -55.71                                                                 | -49.59                                                                 | -54.15                                                                 | -25.21                                                                 | -31.66                                                                 |
| $\Delta E_{\text{Pauli}}$       | 116.81                                                                 | 142.62                                                                 | 110.47                                                                 | 81.47                                                                  | 100.62                                                                 |
| $\Delta E_{\text{elstat}}$      | -99.61<br>(57.74%)                                                     | -111.79<br>(58.17%)                                                    | -93.84<br>(57.00%)                                                     | -65.62<br>(61.51%)                                                     | -79.41<br>(60.03%)                                                     |
| $\Delta E_{\text{orb}}$         | -72.92<br>(42.26%)                                                     | -80.38<br>(41.83%)                                                     | -70.78<br>(43.00%)                                                     | -41.06<br>(38.48%)                                                     | -52.87<br>(39.97%)                                                     |
| $\Delta E_{\text{orb } \sigma}$ | -53.68<br>(73.61%)                                                     | -61.59<br>(76.62%)                                                     | -53.68<br>(75.84%)                                                     | -31.24<br>(76.08%)                                                     | -42.75<br>(80.86%)                                                     |
| $\Delta E_{\text{orb } \pi}$    | -12.79<br>(17.53%)                                                     | -15.75<br>(19.59%)                                                     | -19.34<br>(27.32%)                                                     | -7.88<br>(19.19%)                                                      | -7.29<br>(13.79%)                                                      |
| $\Delta E(\text{kcal/mol})$     | Fe + (OB) <sup>-</sup>                                                 | Co + (OB) <sup>-</sup>                                                 | Ni + (OB) <sup>-</sup>                                                 | Cu + (OB) <sup>-</sup>                                                 | Zn + (OB) <sup>-</sup>                                                 |
| Interaction fragments           | Fe( $\pi^2\delta^3\sigma^1$ )<br>OB <sup>-</sup> ( $1\pi^45\sigma^2$ ) | Co( $\pi^4\delta^3\sigma^1$ )<br>OB <sup>-</sup> ( $1\pi^45\sigma^2$ ) | Ni( $\pi^4\delta^3\sigma^2$ )<br>OB <sup>-</sup> ( $1\pi^45\sigma^2$ ) | Cu( $\pi^4\delta^4\sigma^2$ )<br>OB <sup>-</sup> ( $1\pi^45\sigma^2$ ) | Zn( $\pi^4\delta^4\sigma^2$ )<br>OB <sup>-</sup> ( $1\pi^45\sigma^2$ ) |
| $\Delta E_{\text{int}}$         | -45.14                                                                 | -33.67                                                                 | -39.83                                                                 | -31.03                                                                 | -11.70                                                                 |
| $\Delta E_{\text{Pauli}}$       | 90.67                                                                  | 75.65                                                                  | 78.47                                                                  | 96.48                                                                  | 60.11                                                                  |
| $\Delta E_{\text{elstat}}$      | -81.97<br>(60.36%)                                                     | -63.30<br>(57.90%)                                                     | -70.36<br>(59.48%)                                                     | -78.15<br>(61.28%)                                                     | -44.16<br>(61.50%)                                                     |
| $\Delta E_{\text{orb}}$         | -53.84<br>(39.64%)                                                     | -46.02<br>(42.10%)                                                     | -47.94<br>(40.52%)                                                     | -49.37<br>(38.72%)                                                     | -27.64<br>(38.50%)                                                     |
| $\Delta E_{\text{orb } \sigma}$ | -33.52<br>(62.26%)                                                     | -30.37<br>(65.99%)                                                     | -34.06<br>(71.05%)                                                     | -41.61<br>(84.28%)                                                     | -23.76<br>(85.96%)                                                     |
| $\Delta E_{\text{orb } \pi}$    | -8.24<br>(15.30%)                                                      | -4.79<br>(10.41%)                                                      | -5.34<br>(11.13%)                                                      | -4.17<br>(8.47%)                                                       | -2.94<br>(10.64%)                                                      |

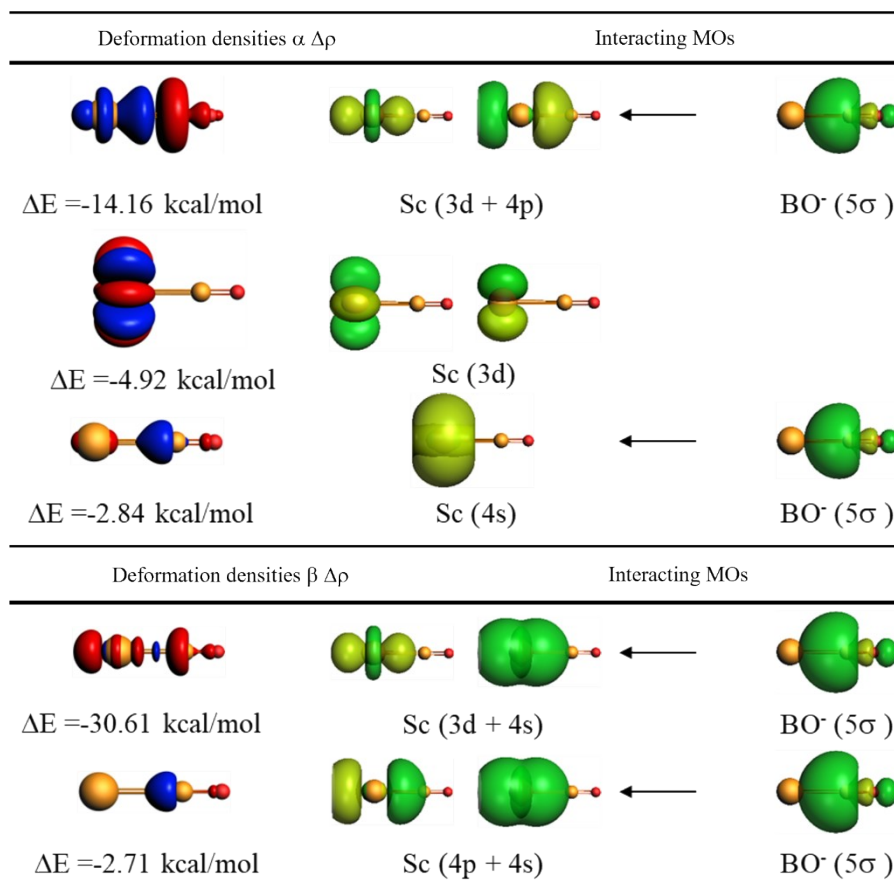

**Figure S3.** The deformation densities  $\Delta\rho$  of the most important pairwise orbital interactions ( $\Delta E_{\text{orb}}$ ) of ScBO<sup>-</sup> between Sc (...3d<sup>1</sup>4s<sup>2</sup>) and BO<sup>-</sup> (...1 $\pi^4$  5 $\sigma^2$  2 $\pi^0$ ) at the PBE/TZ2P level. The direction of the charge flow is from red to blue.

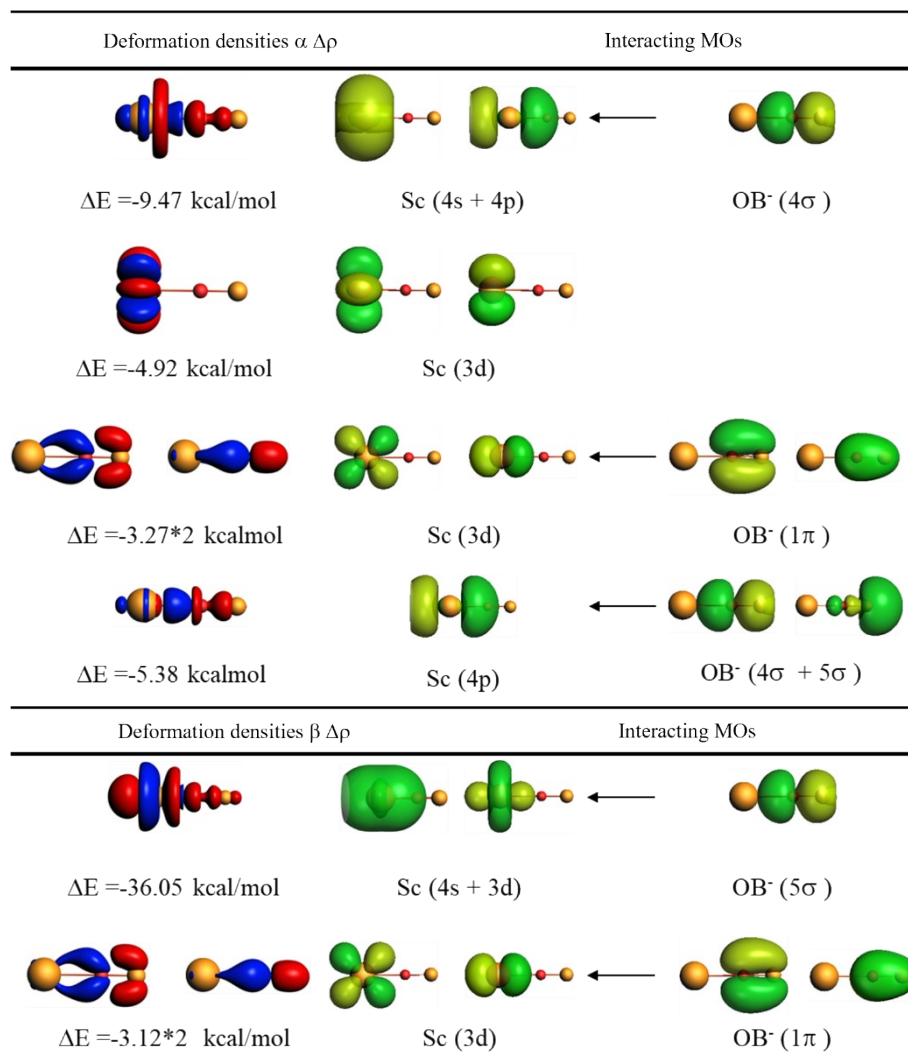

**Figure S4.** The deformation densities  $\Delta\rho$  of the most important pairwise orbital interactions ( $\Delta E_{\text{orb}}$ ) of ScOB<sup>-</sup> between Sc (...3d<sup>1</sup>4s<sup>2</sup>) and OB<sup>-</sup> (...1 $\pi^4$  5 $\sigma^2$  2 $\pi^0$ ) at the PBE/TZ2P level. The direction of the charge flow is from red to blue.

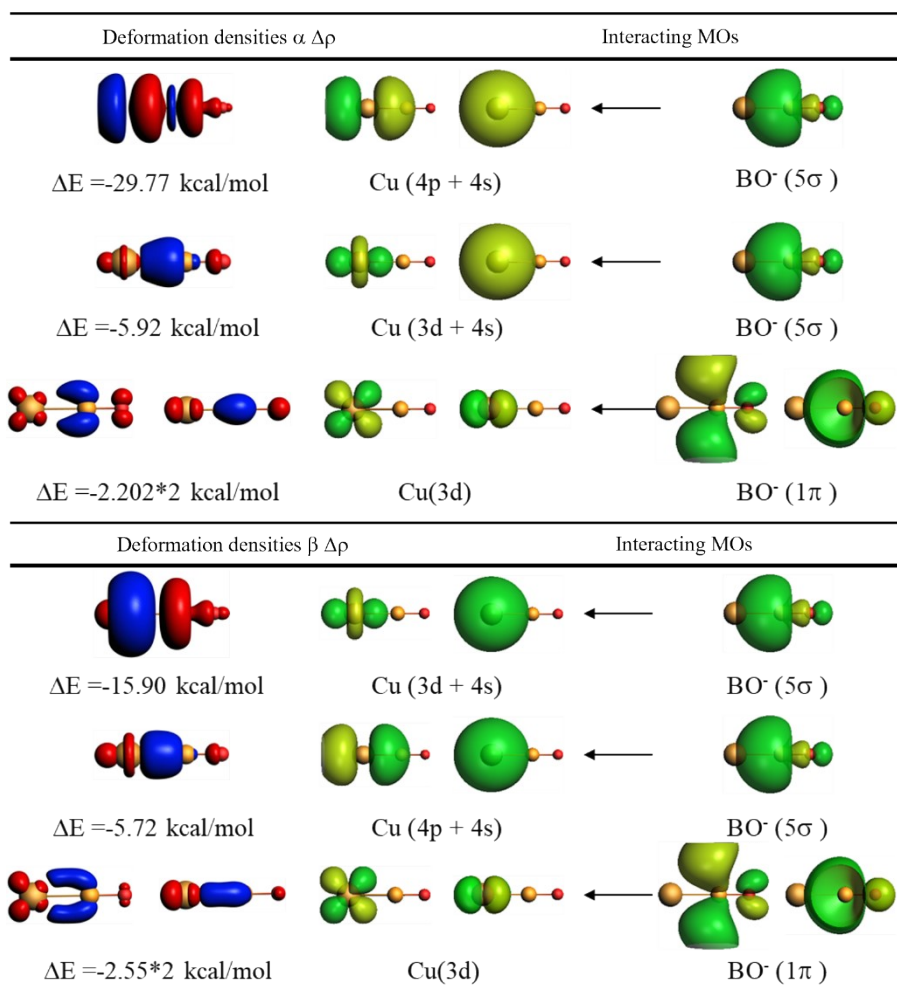

**Figure S5.** The deformation densities  $\Delta\rho$  of the most important pairwise orbital interactions ( $\Delta E_{\text{orb}}$ ) of CuBO<sup>-</sup> between Cu(...3d<sup>10</sup>4s<sup>1</sup>) and BO<sup>-</sup>(...1 $\pi^4$  5 $\sigma^2$  2 $\pi^0$ ) at the PBE/TZ2P level. The direction of the charge flow is from red to blue.

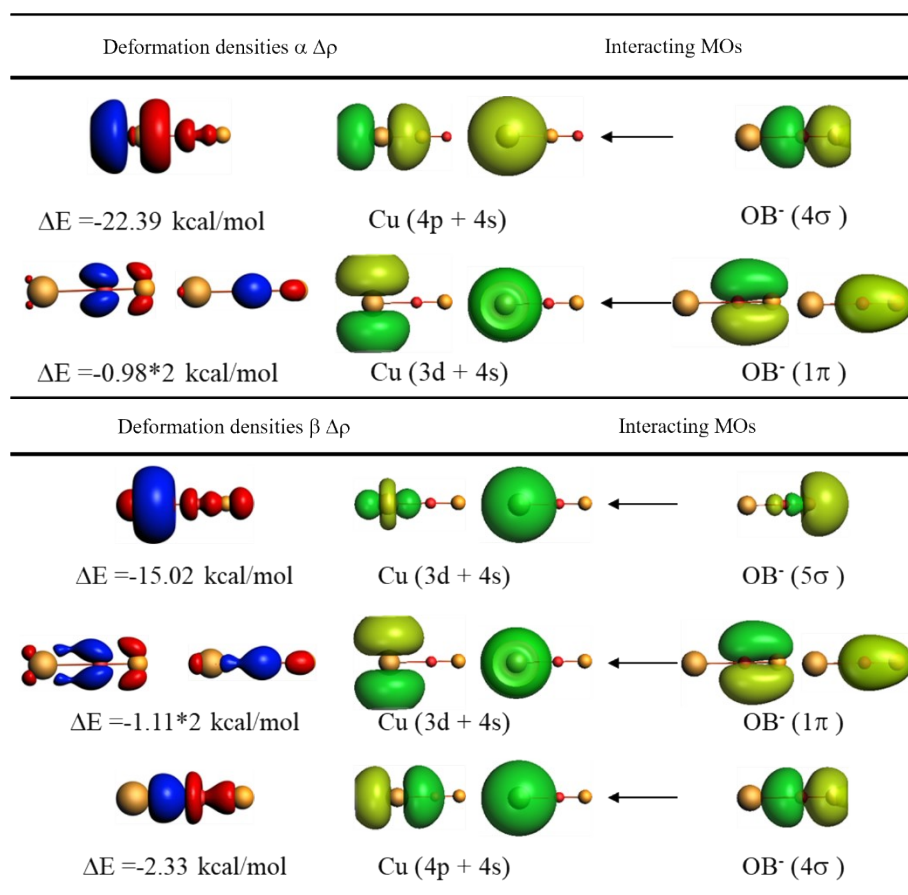

**Figure S6.** The deformation densities  $\Delta\rho$  of the most important pairwise orbital interactions ( $\Delta E_{\text{orb}}$ ) of CuOB<sup>-</sup> between Cu(...3d<sup>10</sup>4s<sup>1</sup>) and OB<sup>-</sup>(...1 $\pi^4$  5 $\sigma^2$  2 $\pi^0$ ) at the PBE/TZ2P level. The direction of the charge flow is from red to blue.

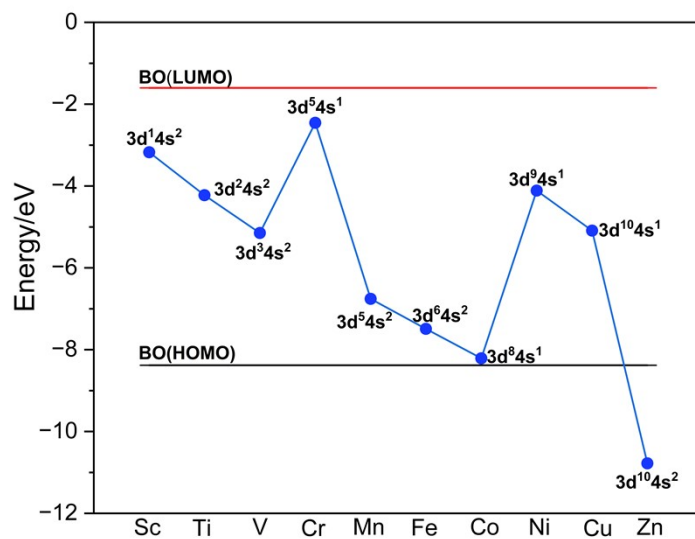

**Figure S7.** The molecular orbital (MO) energies of the BO<sup>-</sup> frontier molecular orbitals (HOMO and LUMO) and the 3d orbitals of transition metals M (Sc–Zn), illustrating how the metal(3d) energy stabilization governs metal–ligand interaction trends.

**Table S12.** Relative energies (in kcal/mol) of the lowest-lying species for MOB<sup>-</sup> and MBO<sup>-</sup> (M=Ni, Pd, Pt) complexes at the PBE, PBE0 and CCSD(T) levels of theory, respectively.

| M  | PBE              |                  | PBE0             |                  | CCSD(T)          |                  |
|----|------------------|------------------|------------------|------------------|------------------|------------------|
|    | -BO <sup>-</sup> | -OB <sup>-</sup> | -BO <sup>-</sup> | -OB <sup>-</sup> | -BO <sup>-</sup> | -OB <sup>-</sup> |
| Ni | 0.00             | 19.42            | 0.00             | -15.89           | 0.00             | 22.99            |
| Pd | 0.00             | 55.41            | 0.00             | 50.90            | 0.00             | 54.95            |
| Pt | 0.00             | 80.84            | 0.00             | 77.79            | 0.00             | 79.48            |

**Table S13.** The EDA-NOCV results for the MBO<sup>-</sup> (M=Ni, Pd, Pt) complexes at the PBE/TZ2P level. All energies are given in kcal·mol<sup>-1</sup>. The table lists the total interaction energy ( $\Delta E_{\text{int}}$ ), Pauli repulsion ( $\Delta E_{\text{Pauli}}$ ), electrostatic interaction ( $\Delta E_{\text{elstat}}$ ), and orbital interaction ( $\Delta E_{\text{orb}}$ ), together with the  $\sigma$ - and  $\pi$ -components of  $\Delta E_{\text{orb}}$  ( $\Delta E_{\text{orb } \sigma}$  and  $\Delta E_{\text{orb } \pi}$ ). Percentages in parentheses indicate the relative contributions of  $\Delta E_{\text{elstat}}$  and  $\Delta E_{\text{orb}}$  to the total attractive interactions ( $\Delta E_{\text{elstat}} + \Delta E_{\text{orb}}$ ), and of

| $\Delta E(\text{kcal/mol})$     | Ni(BO) <sup>-</sup>                                                    | Pd(BO) <sup>-</sup>                                                    | Pt(BO) <sup>-</sup>                                                    |
|---------------------------------|------------------------------------------------------------------------|------------------------------------------------------------------------|------------------------------------------------------------------------|
| Interaction fragments           | Ni( $\pi^4\delta^3\sigma^2$ )<br>BO <sup>-</sup> ( $1\pi^45\sigma^2$ ) | Pd( $\pi^4\delta^4\sigma^2$ )<br>BO <sup>-</sup> ( $1\pi^45\sigma^2$ ) | Pt( $\pi^4\delta^4\sigma^1$ )<br>BO <sup>-</sup> ( $1\pi^45\sigma^2$ ) |
| $\Delta E_{\text{int}}$         | -63.00                                                                 | -84.55                                                                 | -129.98                                                                |
| $\Delta E_{\text{Pauli}}$       | 190.83                                                                 | 322.54                                                                 | 446.81                                                                 |
| $\Delta E_{\text{elstat}}$      | -180.04                                                                | -325.55                                                                | -430.10                                                                |
|                                 | (70.65%)                                                               | (79.97%)                                                               | (74.57%)                                                               |
| $\Delta E_{\text{orb}}$         | -74.79                                                                 | -81.54                                                                 | -146.69                                                                |
|                                 | (29.35%)                                                               | (20.03%)                                                               | (25.43%)                                                               |
| $\Delta E_{\text{orb } \sigma}$ | -51.95                                                                 | -55.18                                                                 | -104.94                                                                |
|                                 | (69.46%)                                                               | (67.67%)                                                               | (71.54%)                                                               |
| $\Delta E_{\text{orb } \pi}$    | -13.62                                                                 | -26.02                                                                 | -38.34                                                                 |
|                                 | (18.21%)                                                               | (31.91%)                                                               | (26.14%)                                                               |

$\Delta E_{\text{orb } \sigma}$  and  $\Delta E_{\text{orb } \pi}$  to  $\Delta E_{\text{orb}}$ , respectively.
